# Supplementary material for: Lewis acid–base adducts of Al(N(C6F5)2)3 and Ga(N(C6F5)2)3 – structural features and dissociation enthalpies
Source: Royal Society of Chemistry journal article supplement (doi:10.1039/d2dt00003b), 2022-01-01
Supplement: d2dt00003b1.pdf [file d2dt00003b1.pdf]

# Supporting Information

## Lewis Acid-Base Adducts of $\text{Al}(\text{N}(\text{C}_6\text{F}_5)_2)_3$ and $\text{Ga}(\text{N}(\text{C}_6\text{F}_5)_2)_3$ – Structural Features and Dissociation Enthalpies.

Julius F. Kögel, Denis A. Sorokin, Martin Scott, Klaus Harms, Daniel Himmel, Ingo Krossing and  
Jörg Sundermeyer

### Table of Contents

|                              |    |
|------------------------------|----|
| Crystallographic Details     | S2 |
| Crystallographic Tables      | S3 |
| $^{19}\text{F}$ NMR Spectra  | S5 |
| Quantumchemical Calculations | S7 |

## Crystallographic Details

IPDS II or IPDS 2T (Stoe) diffractometers were used for data collection by the x-ray department at the Philipps-Universität Marburg (Dr. K. Harms, M. Marsch, and R. Riedel). Data collection, reduction and cell refinement were performed with Stoe IPDS Software. Structures were solved with direct methods using SHELXS-97,<sup>1</sup> SIR92<sup>2</sup> or SIR2004<sup>3</sup> and refined against  $F^2$  with SHELXL-97,<sup>4</sup> all within the user interface of WinGX. Furthermore, the programs Mercury 3.1<sup>5</sup> and Platon<sup>6</sup> were used during refinement. Absorption correction was performed with semi-empirical methods within WinGX (multi-scan or Gaussian<sup>7</sup>).

Hydrogen atoms were calculated in their idealized positions and refined with fixed isotropic thermal parameters. All molecular structures were illustrated with Diamond 3<sup>8</sup> using thermal ellipsoids at the 30% probability level.

Crystal data and experimental conditions of molecular structures presented in the main manuscript are listed in Table S1 and S2. The corresponding CIF files providing full information concerning the molecular structures and experimental conditions are deposited at the Cambridge Crystallographic Data Center (CCDC numbers 2012101-2012106).

**Table S1.** Crystal data and experimental conditions.

|                                               | <b>Al(N(C<sub>6</sub>F<sub>5</sub>)<sub>2</sub>)<sub>3</sub><br/>·NCMe</b>                                       | <b>Al(N(C<sub>6</sub>F<sub>5</sub>)<sub>2</sub>)<sub>3</sub><br/>·CN<i>t</i>Bu</b> | <b>Ga(N(C<sub>6</sub>F<sub>5</sub>)<sub>2</sub>)<sub>3</sub><br/>·NCMe</b>                            |
|-----------------------------------------------|------------------------------------------------------------------------------------------------------------------|------------------------------------------------------------------------------------|-------------------------------------------------------------------------------------------------------|
| empirical formula                             | C <sub>76</sub> H <sub>6</sub> Al <sub>2</sub> F <sub>60</sub> N <sub>8</sub> ,<br>C <sub>7</sub> H <sub>8</sub> | C <sub>41</sub> H <sub>9</sub> AlF <sub>30</sub> N <sub>4</sub>                    | 2(C <sub>38</sub> H <sub>3</sub> F <sub>30</sub> GaN <sub>4</sub> ),<br>C <sub>7</sub> H <sub>8</sub> |
| mol. weight [g mol <sup>-1</sup> ]            | 2316.98                                                                                                          | 1154.50                                                                            | 2402.46                                                                                               |
| crystal habit                                 | colorless nugget                                                                                                 | colorless prism                                                                    | colorless block                                                                                       |
| crystal size [mm <sup>3</sup> ]               | 0.60 · 0.30 · 0.25                                                                                               | 0.33 · 0.21 · 0.15                                                                 | 0.2 · 0.15 · 0.09                                                                                     |
| crystal system                                | triclinic                                                                                                        | triclinic                                                                          | triclinic                                                                                             |
| space group                                   | <i>P</i> -1                                                                                                      | <i>P</i> -1                                                                        | <i>P</i> -1                                                                                           |
| a [Å]                                         | 11.5512(14)                                                                                                      | 11.0496(7)                                                                         | 11.5100(18)                                                                                           |
| b [Å]                                         | 13.7744(15)                                                                                                      | 11.2003(7)                                                                         | 13.793(2)                                                                                             |
| c [Å]                                         | 14.3749(17)                                                                                                      | 19.9634(13)                                                                        | 14.2825(19)                                                                                           |
| α [°]                                         | 84.728(13)                                                                                                       | 76.132(5)                                                                          | 84.719(11)                                                                                            |
| β [°]                                         | 71.409(14)                                                                                                       | 83.514(5)                                                                          | 71.532(11)                                                                                            |
| γ [°]                                         | 71.218(13)                                                                                                       | 61.578(5)                                                                          | 71.500(11)                                                                                            |
| volume [Å <sup>3</sup> ]                      | 2052.3(4)                                                                                                        | 2109.5(2)                                                                          | 2039.4(5)                                                                                             |
| Z                                             | 1                                                                                                                | 2                                                                                  | 1                                                                                                     |
| density [g cm <sup>-3</sup> ]                 | 1.875                                                                                                            | 1.818                                                                              | 1.968                                                                                                 |
| T [K]                                         | 193(2)                                                                                                           | 193(2)                                                                             | 100(2)                                                                                                |
| absorption coeff. [mm <sup>-1</sup> ]         | 0.227                                                                                                            | 0.221                                                                              | 0.854                                                                                                 |
| Θ range [°]                                   | 2.0 to 26.0                                                                                                      | 2.1 to 26.2                                                                        | 1.5 to 26.0                                                                                           |
| index ranges                                  | -14 ≤ h ≤ 14,<br>-16 ≤ k ≤ 16,<br>-17 ≤ l ≤ 17                                                                   | -13 ≤ h ≤ 13,<br>-13 ≤ k ≤ 13,<br>-24 ≤ l ≤ 24                                     | -14 ≤ h ≤ 14,<br>-16 ≤ k ≤ 17,<br>-17 ≤ l ≤ 17                                                        |
| reflns collected                              | 20413                                                                                                            | 31007                                                                              | 19267                                                                                                 |
| independent reflns                            | 7521 [R(int) =<br>0.0385]                                                                                        | 8435<br>[R(int) = 0.0255]                                                          | 8051<br>[R(int) = 0.0943]                                                                             |
| absorption correction                         | gaussian                                                                                                         | multi-scan                                                                         | multi-scan                                                                                            |
| max. and min.<br>transmission                 | 0.9635 and 0.9167                                                                                                | 0.9659 and<br>0.9336                                                               | 1.1269 and 0.754                                                                                      |
| transmissiondata/restraints<br>/parameters    | 7521 / 46 / 675                                                                                                  | 8435 / 3 / 683                                                                     | 8051 / 1 / 675                                                                                        |
| goodness-of-fit on F <sup>2</sup>             | 1.013                                                                                                            | 1.038                                                                              | 0.733                                                                                                 |
| final R indices [I>2σ(I)]                     | R1 = 0.0398                                                                                                      | R1 = 0.0380                                                                        | R1 = 0.0504                                                                                           |
| R indices (all data)                          | wR2 = 0.1104                                                                                                     | wR2 = 0.1044                                                                       | wR2 = 0.1239                                                                                          |
| larg. diff. peak/hole<br>[e Å <sup>-3</sup> ] | 0.390 / -0.493                                                                                                   | 0.424 / -0.462                                                                     | 0.774 / -1.117                                                                                        |
| treatment of H atoms                          | constr.                                                                                                          | constr.                                                                            | constr.                                                                                               |
| CCDC number                                   | 2012101                                                                                                          | 2012102                                                                            | 2012103                                                                                               |

**Table S2.** Crystal data and experimental conditions.

|                                               | <b>Ga(N(C<sub>6</sub>F<sub>5</sub>)<sub>2</sub>)<sub>3</sub><br/>·CN<i>t</i>Bu</b> | <b>Ga(N(C<sub>6</sub>F<sub>5</sub>)<sub>2</sub>)<sub>3</sub><br/>·THF</b>                        | <b>Ga(N(C<sub>6</sub>F<sub>5</sub>)<sub>2</sub>)<sub>3</sub><br/>·PMe<sub>3</sub></b>                        |
|-----------------------------------------------|------------------------------------------------------------------------------------|--------------------------------------------------------------------------------------------------|--------------------------------------------------------------------------------------------------------------|
| empirical formula                             | C <sub>41</sub> H <sub>9</sub> F <sub>30</sub> GaN <sub>4</sub>                    | C <sub>40</sub> H <sub>8</sub> F <sub>30</sub> GaN <sub>3</sub> O, C <sub>7</sub> H <sub>8</sub> | C <sub>39</sub> H <sub>9</sub> F <sub>30</sub> GaN <sub>3</sub> P,<br>0.09(C <sub>42</sub> H <sub>48</sub> ) |
| mol. weight [g mol <sup>-1</sup> ]            | 1197.24                                                                            | 1278.35                                                                                          | 1237.17                                                                                                      |
| crystal habit                                 | colorless prism                                                                    | colorless prism                                                                                  | colorless block                                                                                              |
| crystal size [mm <sup>3</sup> ]               | 0.36 · 0.08 · 0.05                                                                 | 0.29 · 0.20 · 0.11                                                                               | 0.18 · 0.17 · 0.13                                                                                           |
| crystal system                                | triclinic                                                                          | monoclinic                                                                                       | hexagonal                                                                                                    |
| space group                                   | <i>P</i> -1                                                                        | <i>P</i> 21/ <i>n</i>                                                                            | <i>R</i> -3 <i>c</i>                                                                                         |
| a [Å]                                         | 11.0023(4)                                                                         | 17.1941(7)                                                                                       | 13.1449(5)                                                                                                   |
| b [Å]                                         | 11.1257(5)                                                                         | 12.3834(3)                                                                                       | 13.1449(5)                                                                                                   |
| c [Å]                                         | 19.8025(8)                                                                         | 21.3791(7)                                                                                       | 86.201(4)                                                                                                    |
| α [°]                                         | 76.581(3)                                                                          | 90                                                                                               | 90                                                                                                           |
| β [°]                                         | 83.893(3)                                                                          | 102.734(3)                                                                                       | 90                                                                                                           |
| γ [°]                                         | 61.802(3)                                                                          | 90                                                                                               | 120                                                                                                          |
| volume [Å <sup>3</sup> ]                      | 2077.97(15)                                                                        | 4440.1(3)                                                                                        | 12899(1)                                                                                                     |
| Z                                             | 2                                                                                  | 4                                                                                                | 12                                                                                                           |
| density [g cm <sup>-3</sup> ]                 | 1.913                                                                              | 1.912                                                                                            | 1.910                                                                                                        |
| T [K]                                         | 100(2)                                                                             | 100(2)                                                                                           | 100(2)                                                                                                       |
| absorption coeff. [mm <sup>-1</sup> ]         | 0.837                                                                              | 0.792                                                                                            | 0.848                                                                                                        |
| Θ range [°]                                   | 2.1 to 26.8                                                                        | 1.4 to 26.8                                                                                      | 1.4 to 26.8                                                                                                  |
| index ranges                                  | -13 ≤ h ≤ 13,<br>-14 ≤ k ≤ 14,<br>-22 ≤ l ≤ 25                                     | -21 ≤ h ≤ 21,<br>-15 ≤ k ≤ 15,<br>-27 ≤ l ≤ 25                                                   | -16 ≤ h ≤ 16,<br>-16 ≤ k ≤ 16,<br>-108 ≤ l ≤ 96                                                              |
| reflns collected                              | 25604                                                                              | 27479                                                                                            | 45151                                                                                                        |
| independent reflns                            | 8782 [R(int) = 0.0452]                                                             | 9388<br>[R(int) = 0.0467]                                                                        | 3062<br>[R(int) = 0.0859]                                                                                    |
| absorption correction                         | multi-scan                                                                         | multi-scan                                                                                       | multi-scan                                                                                                   |
| max. and min. transmission                    | 0.9015 and 0.8675                                                                  | 0.9711 and 0.7957                                                                                | 1.0402 and 0.7711                                                                                            |
| transmissiondata/restraints<br>/parameters    | 8782 / 18 / 683                                                                    | 9388 / 0 / 740                                                                                   | 3062 / 42 / 241                                                                                              |
| goodness-of-fit on F <sup>2</sup>             | 0.860                                                                              | 0.805                                                                                            | 0.927                                                                                                        |
| final R indices [I>2σ(I)]                     | R1 = 0.0323                                                                        | R1 = 0.0294                                                                                      | R1 = 0.0358                                                                                                  |
| R indices (all data)                          | wR2 = 0.0610                                                                       | wR2 = 0.0592                                                                                     | wR2 = 0.0759                                                                                                 |
| larg. diff. peak/hole<br>[e Å <sup>-3</sup> ] | 0.471 / -0.585                                                                     | 0.421 / -0.284                                                                                   | 0.659 and -0.318                                                                                             |
| treatment of H atoms                          | constr.                                                                            | constr.                                                                                          | constr.                                                                                                      |
| CCDC number                                   | 2012104                                                                            | 2012105                                                                                          | 2012106                                                                                                      |

## NMR Spectra

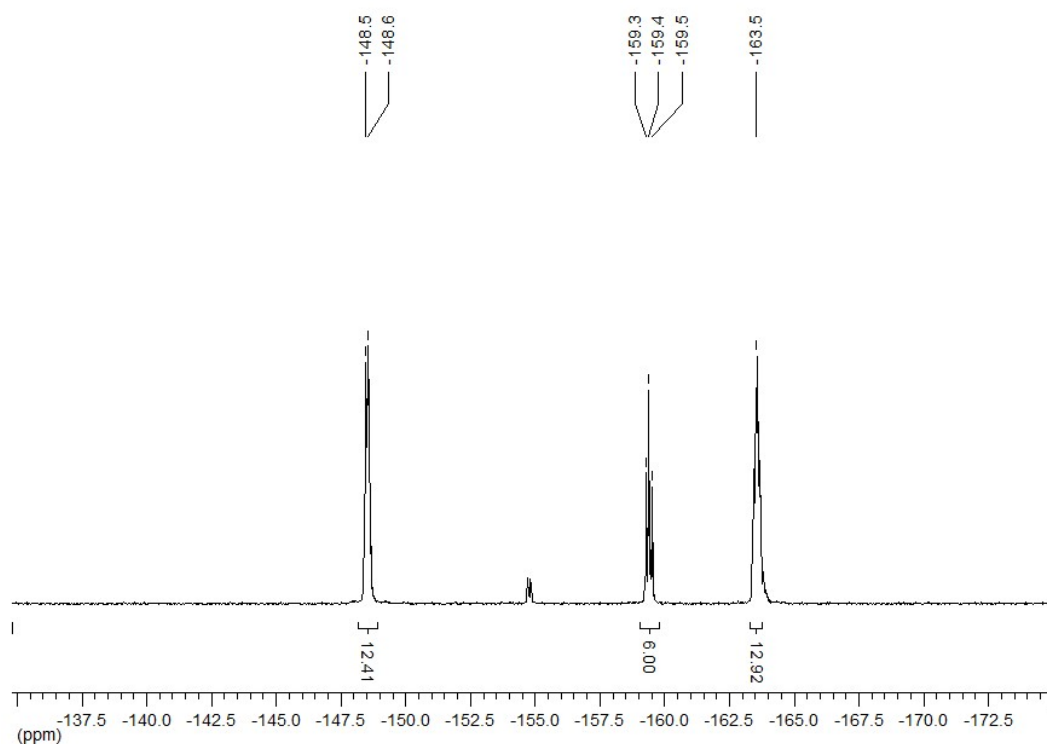

**Figure S1.**  $^{19}\text{F}$  NMR spectrum of  $\text{Al}(\text{N}(\text{C}_6\text{F}_5)_2)_3 \cdot \text{NCMe}$  (**1**·NCMe) (188 MHz,  $[\text{D}_6]$ benzene, 25 °C). The spectrum reveals the presence of a small amount of  $\text{HN}(\text{C}_6\text{F}_5)_2$ , presumably as a consequence of partial hydrolysis (see Figure S3).

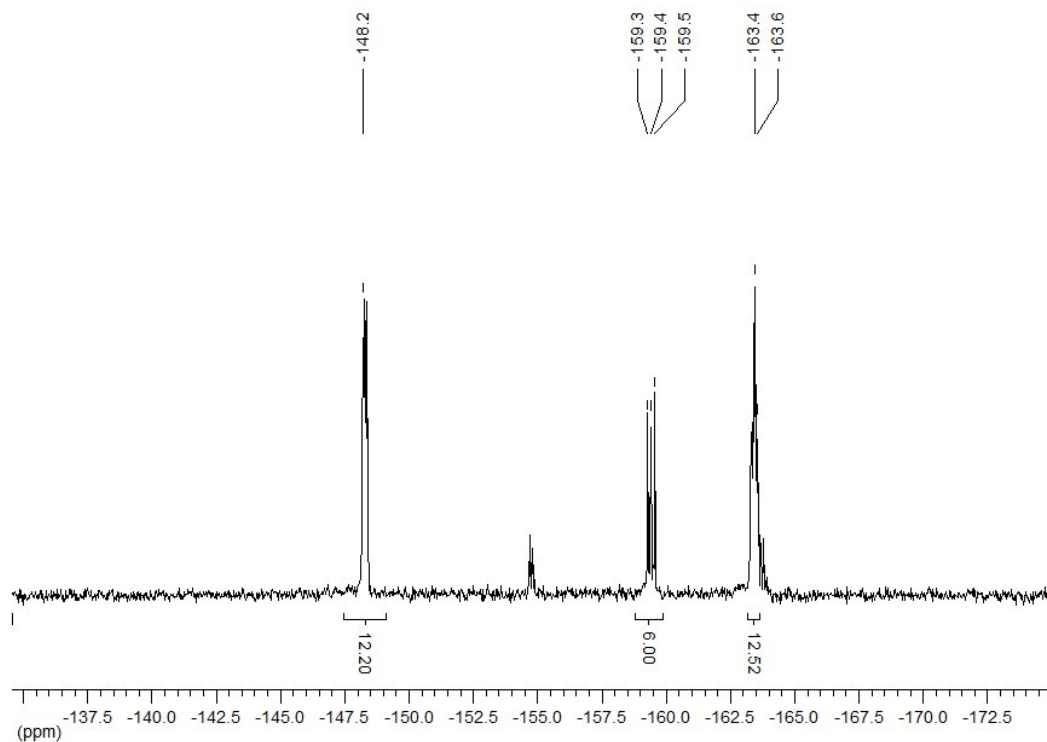

**Figure S2.**  $^{19}\text{F}$  NMR spectrum of  $\text{Al}(\text{N}(\text{C}_6\text{F}_5)_2)_3 \cdot \text{CN}t\text{Bu}$  (**1**·CN*t*Bu) (188 MHz,  $[\text{D}_6]$ benzene, 25 °C). The spectrum reveals the presence of a small amount of  $\text{HN}(\text{C}_6\text{F}_5)_2$ , presumably as a consequence of partial hydrolysis (see Figure S3).

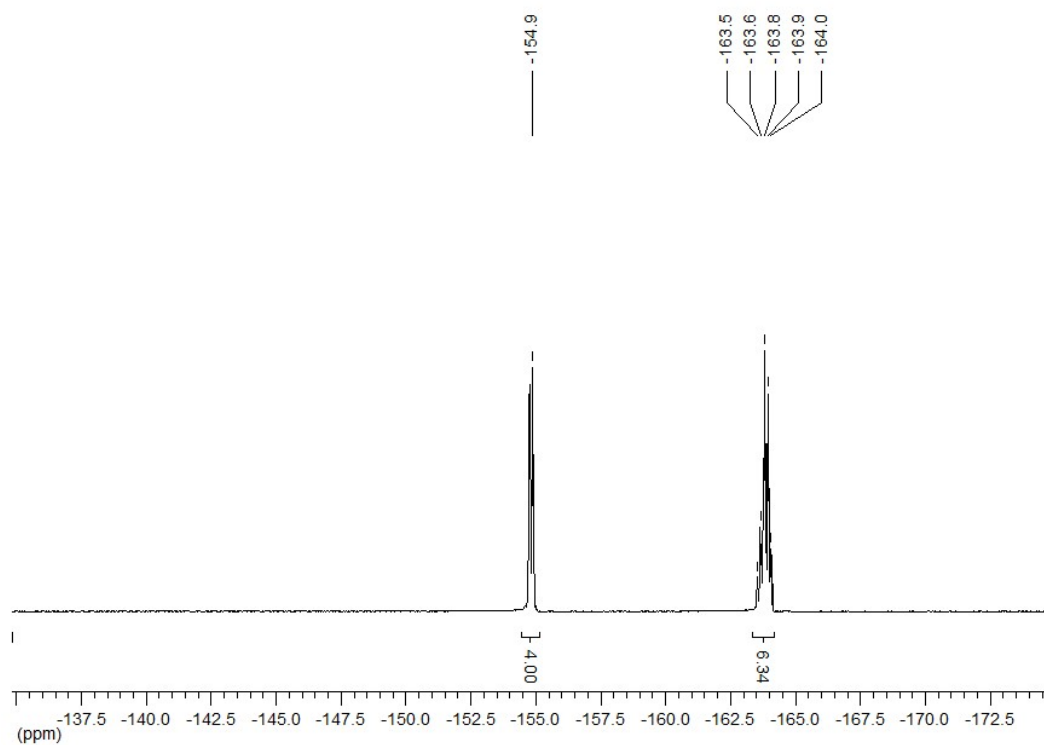

**Figure S3.**  $^{19}\text{F}$  NMR spectrum of  $\text{H}(\text{N}(\text{C}_6\text{F}_5)_2)$  (188 MHz,  $[\text{D}_6]$ benzene, 25 °C).

## Quantumchemical Calculations

The theoretical calculations of the dissociation enthalpies of the six Lewis acid base adducts were calculated as described in the related work on the two Lewis acids  $\text{Al}(\text{N}(\text{C}_6\text{F}_5)_2)_3$  and  $\text{Ga}(\text{N}(\text{C}_6\text{F}_5)_2)_3$ .<sup>9</sup>

The molecular structures obtained by XRD analysis were used as the basis for the theoretical calculations. DFT optimizations were carried out with TURBOMOLE<sup>10,11</sup> at the (RI-)BP86<sup>12,13,14</sup>/def-TZVP<sup>15</sup>, with RI-J auxiliary bases<sup>16,17,18</sup> and D3<sup>19</sup> dispersion correction. Vibrational frequencies were calculated analytically with the AOFORCE<sup>20,21</sup> module and all structures represented true minima without imaginary frequencies on the respective hypersurface. Thermal contributions to *ab initio* reaction energies (see below) were calculated with inclusion of zero point energy, thermal contributions to the enthalpy/entropy (FREEH tool; unscaled<sup>22</sup> BP86/def-TZVP/D3 vibrational frequencies).

RI-MP2 structure optimizations were carried out with TURBOMOLE<sup>10</sup> and def2-QZVPP<sup>15</sup> basis sets and corresponding RI-C auxiliary bases<sup>12</sup> for all atoms. Frozen core: 1s for 2<sup>nd</sup> row elements, 1s2s2p for Al, none for H, 1s2s2p3s3p for Ga.

MP2 and CCSD(T) single point calculations with correlation-consistent basis sets were done with Gaussian 03.<sup>23</sup> Basis set extrapolation was done with the following formula:

$$\Delta E_{\text{CCSD(T)/A'VQZ}} \approx \Delta E_{\text{compound}} = \Delta E_{\text{CCSD(T)/A'VDZ}} + \Delta E_{\text{MP2/A'VQZ}} - \Delta E_{\text{MP2/A'VDZ}}$$

with A'VXZ = cc-pVXZ for H<sup>24</sup>, aug-cc-pV(X+d)Z for Al<sup>25</sup>, aug-cc-pwCVXZ-PP for Ga<sup>26</sup>, aug-cc-pVXZ for 2<sup>nd</sup> row elements<sup>27</sup> (X = D, Q).

Frozen core: 1s for 2<sup>nd</sup> row elements, 1s2s2p for Al, none for H and Ga.

Thermal contributions to reaction energies were calculated with BP86-D3/def-TZVP at 1 bar, 298.15 K:

$$\Delta U^\circ = \Delta E_{\text{QM}} + \Delta E_{\text{vrt}}$$

( $\Delta E_{\text{QM}} = \Delta E_{\text{SCF}}$  for DFT,  $\Delta E_{\text{compound}}$  for ab-initio calculations;  $\Delta E_{\text{vrt}}$  = sum of translational, rotational, and vibrational energy incl. zero point vibrational energy)

$$\Delta H^\circ = \Delta U^\circ + \Delta n RT \quad (\Delta n = \text{particle number change in reaction equation})$$

$$\Delta G^\circ = \Delta H^\circ - 298.15 \text{ K} \cdot \Delta S^\circ$$

**Table S3.** Details on ab initio calculations (with thermal corrections at BP86-D3/def-TZVP level).

| Compound                           | CCSD(T)/A'VDZ<br>[H] | MP2/A'VDZ<br>[H] | MP2/A'VQZ<br>[H] | E <sub>comp</sub><br>[kJ mol <sup>-1</sup> ] | H°<br>[kJ mol <sup>-1</sup> ] | G°<br>[kJ mol <sup>-1</sup> ] |
|------------------------------------|----------------------|------------------|------------------|----------------------------------------------|-------------------------------|-------------------------------|
| MeCN                               | -132,4196669         | -132,3806952     | -132,5341215     | -348070,66                                   | -347943,15                    | -348015,74                    |
| <i>t</i> BuNC                      | -250,0063768         | -249,9105911     | -250,2133618     | -657186,67                                   | -656833,58                    | -656933,10                    |
| Me <sub>3</sub> P                  | -460,2722395         | -460,1873474     | -460,4083507     | -1209025,01                                  | -1208717,28                   | -1208812,17                   |
| THF                                | -231,8566862         | -231,7771111     | -232,0633718     | -609491,31                                   | -609178,63                    | -609267,53                    |
| AlF <sub>3</sub>                   | -541,2162733         | -541,1989255     | -541,5560525     | -1421900,96                                  | -1421867,26                   | -1421950,52                   |
| GaF <sub>3</sub>                   | -557,7289951         | -557,7178246     | -558,3544499     | -1465988,94                                  | -1465957,94                   | -1466045,63                   |
| AlF <sub>3</sub> ·NCMe             | -673,6851857         | -673,628417      | -674,140663      | -1770105,357                                 | -1769938,157                  | -1770056,296                  |
| AlF <sub>3</sub> ·CN <i>t</i> Bu   | -791,2765248         | -791,1648647     | -791,8255492     | -2079231,143                                 | -2078837,403                  | -2078980,268                  |
| GaF <sub>3</sub> ·NCMe             | -690,1922281         | -690,1420866     | -690,9335129     | -1814177,585                                 | -1814013,415                  | -1814137,901                  |
| GaF <sub>3</sub> ·CN <i>t</i> Bu   | -807,7872829         | -807,6826995     | -808,6230837     | -2123314,49                                  | -2122923,68                   | -2123072,695                  |
| GaF <sub>3</sub> ·THF              | -789,6433804         | -789,5518229     | -790,4737929     | -2075629,327                                 | -2075277,927                  | -2075413,675                  |
| GaF <sub>3</sub> ·PMe <sub>3</sub> | -1018,062206         | -1017,968022     | -1018,826449     | -2675176,121                                 | -2674829,751                  | -2674976,044                  |

**Table S4.** Details on BP86-D3/def-TZVP calculations.

| Compound                                                                           | SCF<br>[H]   | E <sub>vrt</sub><br>[kJ mol <sup>-1</sup> ] | S°<br>[kJ mol <sup>-1</sup> K <sup>-1</sup> ] | H°<br>[kJ mol <sup>-1</sup> ] | G°<br>[kJ mol <sup>-1</sup> ] |
|------------------------------------------------------------------------------------|--------------|---------------------------------------------|-----------------------------------------------|-------------------------------|-------------------------------|
| MeCN                                                                               | -132,8083861 | 125,03                                      | 0,24347                                       | -348560,9076                  | -348633,4982                  |
| <i>t</i> BuNC                                                                      | -250,7668404 | 350,61                                      | 0,33381                                       | -658035,2495                  | -658134,775                   |
| Me <sub>3</sub> P                                                                  | -461,1936042 | 305,25                                      | 0,31826                                       | -1210556,078                  | -1210650,967                  |
| THF                                                                                | -232,5480851 | 310,2                                       | 0,29817                                       | -610242,3173                  | -610331,2167                  |
| AlF <sub>3</sub>                                                                   | -542,338235  | 31,22                                       | 0,27925                                       | -1423875,336                  | -1423958,594                  |
| GaF <sub>3</sub>                                                                   | -2224,913325 | 28,52                                       | 0,29413                                       | -5841478,936                  | -5841566,631                  |
| Al(N(C <sub>6</sub> F <sub>5</sub> ) <sub>2</sub> ) <sub>3</sub>                   | -4775,69126  | 965,88                                      | 1,49104                                       | -12537609,04                  | -12538053,6                   |
| Ga(N(C <sub>6</sub> F <sub>5</sub> ) <sub>2</sub> ) <sub>3</sub>                   | -6458,327682 | 966,81                                      | 1,48051                                       | -16955370,04                  | -16955811,45                  |
| AlF <sub>3</sub> ·NCMe                                                             | -675,1962116 | 164,72                                      | 0,39624                                       | -1772560,453                  | -1772678,592                  |
| AlF <sub>3</sub> ·CN <i>t</i> Bu                                                   | -793,1617568 | 391,26                                      | 0,47917                                       | -2082052,452                  | -2082195,317                  |
| GaF <sub>3</sub> ·NCMe                                                             | -2357,763023 | 161,69                                      | 0,41753                                       | -6190142,646                  | -6190267,133                  |
| GaF <sub>3</sub> ·CN <i>t</i> Bu                                                   | -2475,732674 | 388,33                                      | 0,4998                                        | -6499645,327                  | -6499794,342                  |
| GaF <sub>3</sub> ·THF                                                              | -2457,514998 | 348,92                                      | 0,4553                                        | -6451854,228                  | -6451989,976                  |
| GaF <sub>3</sub> ·PMe <sub>3</sub>                                                 | -2686,171113 | 343,89                                      | 0,49067                                       | -7052195,887                  | -7052342,18                   |
| Al(N(C <sub>6</sub> F <sub>5</sub> ) <sub>2</sub> ) <sub>3</sub> ·NCMe             | -4908,546243 | 1100,36                                     | 1,55516                                       | -12886285,32                  | -12886748,99                  |
| Al(N(C <sub>6</sub> F <sub>5</sub> ) <sub>2</sub> ) <sub>3</sub> ·CN <i>t</i> Bu   | -5026,517168 | 1327,39                                     | 1,63319                                       | -13195790,95                  | -13196277,89                  |
| Ga(N(C <sub>6</sub> F <sub>5</sub> ) <sub>2</sub> ) <sub>3</sub> ·NCMe             | -6591,160035 | 1098,3                                      | 1,57196                                       | -17303989,89                  | -17304458,57                  |
| Ga(N(C <sub>6</sub> F <sub>5</sub> ) <sub>2</sub> ) <sub>3</sub> ·CN <i>t</i> Bu   | -6709,13513  | 1325,3                                      | 1,65196                                       | -17613506,5                   | -17613999,04                  |
| Ga(N(C <sub>6</sub> F <sub>5</sub> ) <sub>2</sub> ) <sub>3</sub> ·THF              | -6690,909923 | 1287,76                                     | 1,58031                                       | -17565693,76                  | -17566164,93                  |
| Ga(N(C <sub>6</sub> F <sub>5</sub> ) <sub>2</sub> ) <sub>3</sub> ·PMe <sub>3</sub> | -6919,577661 | 1283,06                                     | 1,56811                                       | -18166065,61                  | -18166533,14                  |



- 
- [1] G. M. Sheldrick, *Acta Crystallogr. Sect. A* 1990, **46**, 467.
- [2] A. Altomare, G. L. Cascarano, C. Giacovazzo and A. Guagliardi, *J. Appl. Cryst.* 1993, **26**, 343.
- [3] M. C. Burla, R. Caliandro, M. Camalli, B. Carrozzini, G. L. Cascarano, L. De Caro, C. Giacovazzo, G. Polidori and R. Spagna, *J. Appl. Crystallogr.* 2005, **38**, 381.
- [4] G. Sheldrick, *Acta Cryst. A* 2008, **64**, 112.
- [5] C. F. Macrae, I. J. Bruno, J. A. Chisholm, P. R. Edgington, P. McCabe, E. Pidcock, L. Rodriguez-Monge, R. Taylor, J. van de Streek and P. A. Wood, *J. Appl. Cryst.* 2008, **41**, 466.
- [6] A. L. Spek, *PLATON, A Multipurpose Crystallographic Tool*, 2011, Utrecht University, NL.
- [7] R. H. Blessing, *Acta Cryst. A* 1995, **51**, 33.
- [8] K. Brandenburg, H. Putz, *Diamond - Crystal and Molecular Structure Visualization v3.2i*, Crystal Impact GbR, Bonn, Germany, 2012.
- [9] J. F. Kögel, D. A. Sorokin, A. Khvorost, M. Scott, K. Harms, D. Himmel, I. Krossing and J. Sundermeyer, *Chem. Sci.* 2018, **9**, 245.
- [10] R. Ahlrichs, M. Bär, M. Häser, H. Horn and C. Kölmel, *Chem. Phys. Lett.* 1989, **162**, 165.
- [11] O. Treutler and R. Ahlrichs, *J. Chem. Phys.* 1995, **102**, 346.
- [12] A. D. Becke, *Phys. Rev. A* 1988, **38**, 3098.
- [13] J. P. Perdew, *Phys. Rev. B* 1986, **33**, 8822.
- [14] J. P. Perdew, *Phys. Rev. B* 1986, **34**, 7406.
- [15] A. Schäfer, H. Horn and R. Ahlrichs, *J. Chem. Phys.* 1992, **97**, 2571.
- [16] K. Eichkorn, O. Treutler, H. Öhm, M. Häser and R. Ahlrichs, *Chem. Phys. Lett.* 1995, **240**, 283.
- [17] K. Eichkorn, O. Treutler, H. Öhm, M. Häser and Ahlrichs, *Chem. Phys. Lett.* 1995, **242**, 652.
- [18] K. Eichkorn, F. Weigend, O. Treutler and R. Ahlrichs, *Theor. Chem. Acc.* 1997, **97**, 119.
- [19] S. Grimme, J. Antony, S. Ehrlich and H. Krieg, *J. Chem. Phys* 2010, **132**, 154104.
- [20] P. Deglmann, F. Furche and R. Ahlrichs, *Chem. Phys. Lett.* 2002, **362**, 511.
- [21] P. Deglmann and F. Furche, *J. Chem. Phys.* 2002, **117**, 9535.
- [22] By chance scaling factors for BP86/def-TZVP frequencies are very close to unity. Therefore we did not scale the contributions to entropy/enthalpy.
- [23] Gaussian 03, Revision C.02, M. J. Frisch, G. W. Trucks, H. B. Schlegel, G. E. Scuseria, M. A. Robb, J. R. Cheeseman, J. A. Montgomery, Jr., T. Vreven, K. N. Kudin, J. C. Burant, J. M. Millam, S. S. Iyengar, J. Tomasi, V. Barone, B. Mennucci, M. Cossi, G. Scalmani, N. Rega, G. A. Petersson, H. Nakatsuji, M. Hada, M. Ehara, K. Toyota, R. Fukuda, J. Hasegawa, M. Ishida, T. Nakajima, Y. Honda, O. Kitao, H. Nakai, M. Klene, X. Li, J. E. Knox, H. P. Hratchian, J. B. Cross, V. Bakken, C. Adamo, J. Jaramillo, R. Gomperts, R. E. Stratmann, O. Yazyev, A. J. Austin, R. Cammi, C. Pomelli, J. W. Ochterski, P. Y. Ayala, K. Morokuma, G. A. Voth, P. Salvador, J. J. Dannenberg, V. G. Zakrzewski, S. Dapprich, A. D. Daniels, M. C. Strain, O. Farkas, D. K. Malick, A. D. Rabuck, K. Raghavachari, J. B. Foresman, J. V. Ortiz, Q. Cui, A. G. Baboul, S. Clifford, J. Cioslowski, B. B. Stefanov, G. Liu, A. Liashenko, P. Piskorz, I. Komaromi, R. L. Martin, D. J. Fox, T. Keith, M. A. Al-Laham, C. Y. Peng, A. Nanayakkara, M. Challacombe, P. M. W. Gill, B. Johnson, W. Chen, M. W. Wong, C. Gonzalez, and J. A. Pople, Gaussian, Inc., Wallingford CT, 2004.
- [24] T. H. Dunning, *J. Chem. Phys.* 1989, **90**, 1007.
- [25] T. H. Dunning, K. A. Peterson and A. K. Wilson, *J. Chem. Phys.* 2001, **114**, 9244.

---

[26] N. J. DeYonker, K. A. Peterson and A. K. Wilson, *J. Phys. Chem. A* 2007, **111**, 11383.

[27] R. Kendall, T. H. Dunning and R. J. Harrison, *J. Chem. Phys.* 1992, **96**, 6796.
